# Supplementary material for: Induction of ‘banana phases’ in binary systems composed of bent-core and calamitic mesogen
Source: Royal Society of Chemistry journal article supplement (doi:10.1039/b916685h), 2010-01-01
Supplement: b916685h.pdf [file b916685h.pdf]

Supporting information to

**Induction of 'banana phases' in binary systems composed of bent-core and calamitic mesogens**

S. Haddawi\*, M.-G. Tamba, G. Pelzl, W. Weissflog, U. Baumeister

\* Chemistry Department, College of Science, Kerbala University, Kerbala, Iraq

Martin-Luther-Universität Halle-Wittenberg, Institut für Physikalische Chemie,

Mühlpforte 1, D-06108 Halle, Germany

**Additional Figures:**

**System A/C**

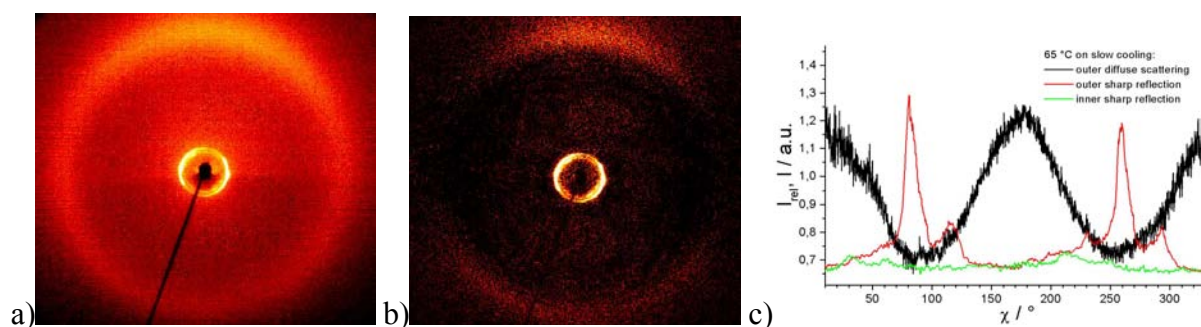

**Figure S1:** X-ray diffraction pattern for the  $B_X$  phase of a partially surface-aligned sample for a mixture of 74 % **C** and 26 % **A** at 65 °C on cooling a) original pattern, b) intensity of the isotropic liquid subtracted from the pattern in a) to enhance the maxima of the outer diffuse scattering, c)  $\chi$  scan for the outer diffuse scattering ( $I_{\text{rel}} = I_{65\text{ °C}} / I_{95\text{ °C}}$ , isotropic liquid), red and green line:  $\chi$  scans for the inner reflections for comparison.

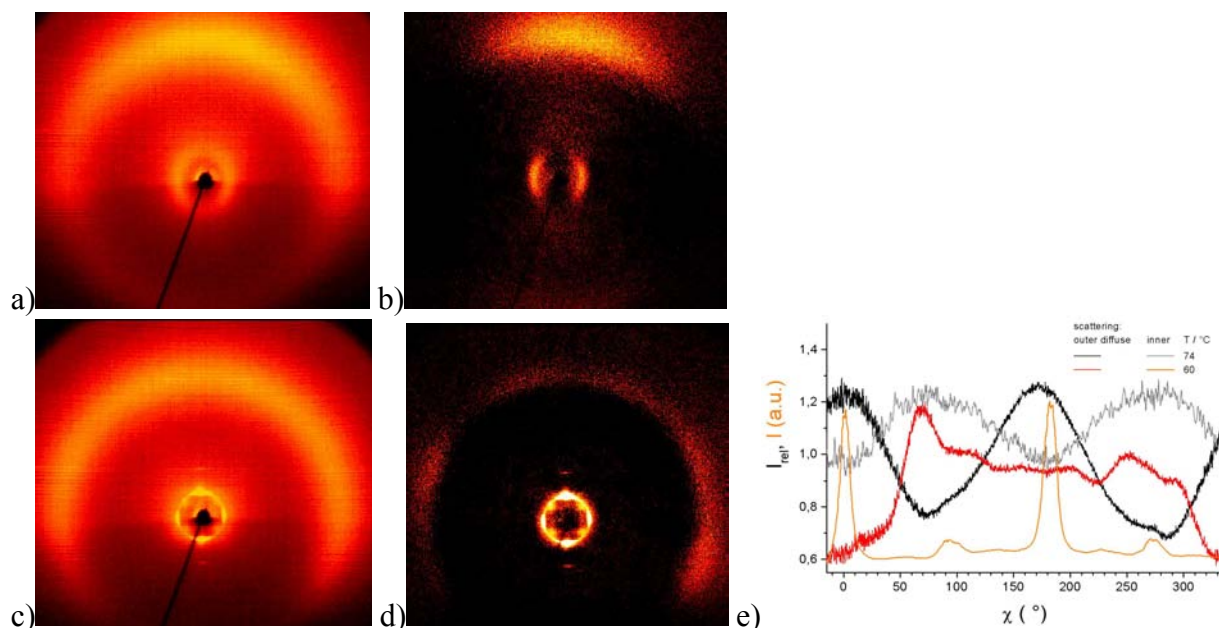

**Figure S2:** X-ray diffraction patterns of a partially surface-aligned sample for a mixture of 82 % C and 18 % A at two temperatures on cooling: a, c) original patterns, b, d) intensity of the isotropic liquid subtracted from these patterns to enhance the maxima of the outer diffuse scattering, a, b) nematic phase at 74 °C, c, d)  $B_X$  phase at 60 °C e)  $\chi$  scans for the outer diffuse scattering ( $I_{\text{rel}} = I_T / I_{95\text{ }^\circ\text{C}}$ , isotropic liquid), light gray and orange line:  $\chi$  scans for the inner reflections for comparison.

### System A/D

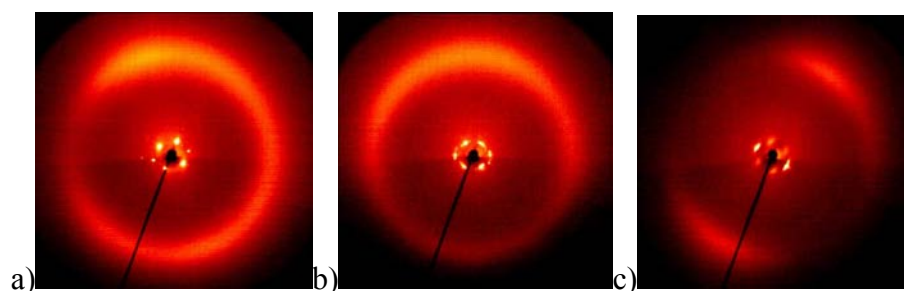

**Figure S3:** X-ray diffraction patterns of surface-aligned samples on cooling for system A/D, a) mixture of 50 % A and 50 % D, b) mixture of 40 % A and 60 % D, both at 90 °C in the  $\text{Col}_{\text{rec}}$  phase, c) mixture of 25 % A and 75 % D at 80 °C in the  $B_X$  phase

**System B/F**

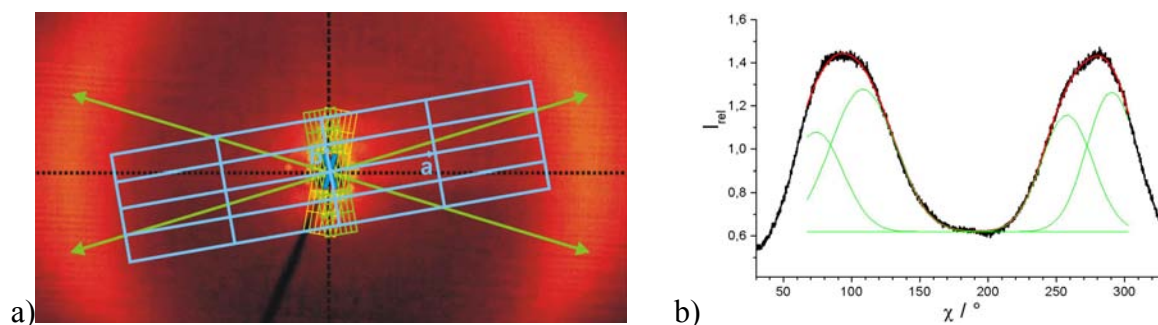

**Figure S4:** a) X-ray diffraction pattern of a surface-aligned sample for a mixture of 60 % **F** and 40 % **B** at 90 °C on cooling: Green, yellow ... reciprocal 2D lattices, green arrows indicating the direction of the maximum diffuse scattering; dashed black ... equator and meridian of the pattern, respectively; blue ... corresponding real 2D lattice, blue rods indicating the two possible orientations of the long molecular axes. The approximate tilt of the **b** axis with respect to the meridian of the pattern is 10°, hence the molecules are tilted with respect to **b** by  $17^\circ - 10^\circ = 7^\circ$  or by  $17^\circ + 10^\circ = 27^\circ$ , b)  $\chi$  scan for the outer diffuse scattering ( $I_{\text{rel}} = I_{90\text{ °C}}/I_{110\text{ °C}}$ , isotropic liquid), Gaussian fit (red line) for 4 maxima (green lines) to the experimental one (black line)

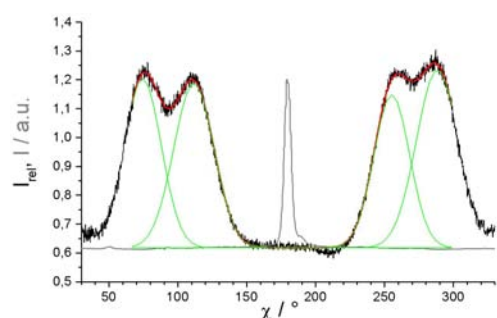

**Figure S5:** a)  $\chi$  scan for the outer diffuse scattering ( $I_{\text{rel}} = I_{92\text{ °C}}/I_{110\text{ °C}}$ , isotropic liquid) in the X-ray diffraction pattern of a surface-aligned sample for a mixture of 70 % **F** and 30 % **B**, Gaussian fit (red line) for 4 maxima (green lines) to the experimental one (black line, gray line: layer reflection for comparison) revealing a 18° tilt of the molecules with respect to the normal to the **b** axis (i.e. to the normal of the “broken” layers)

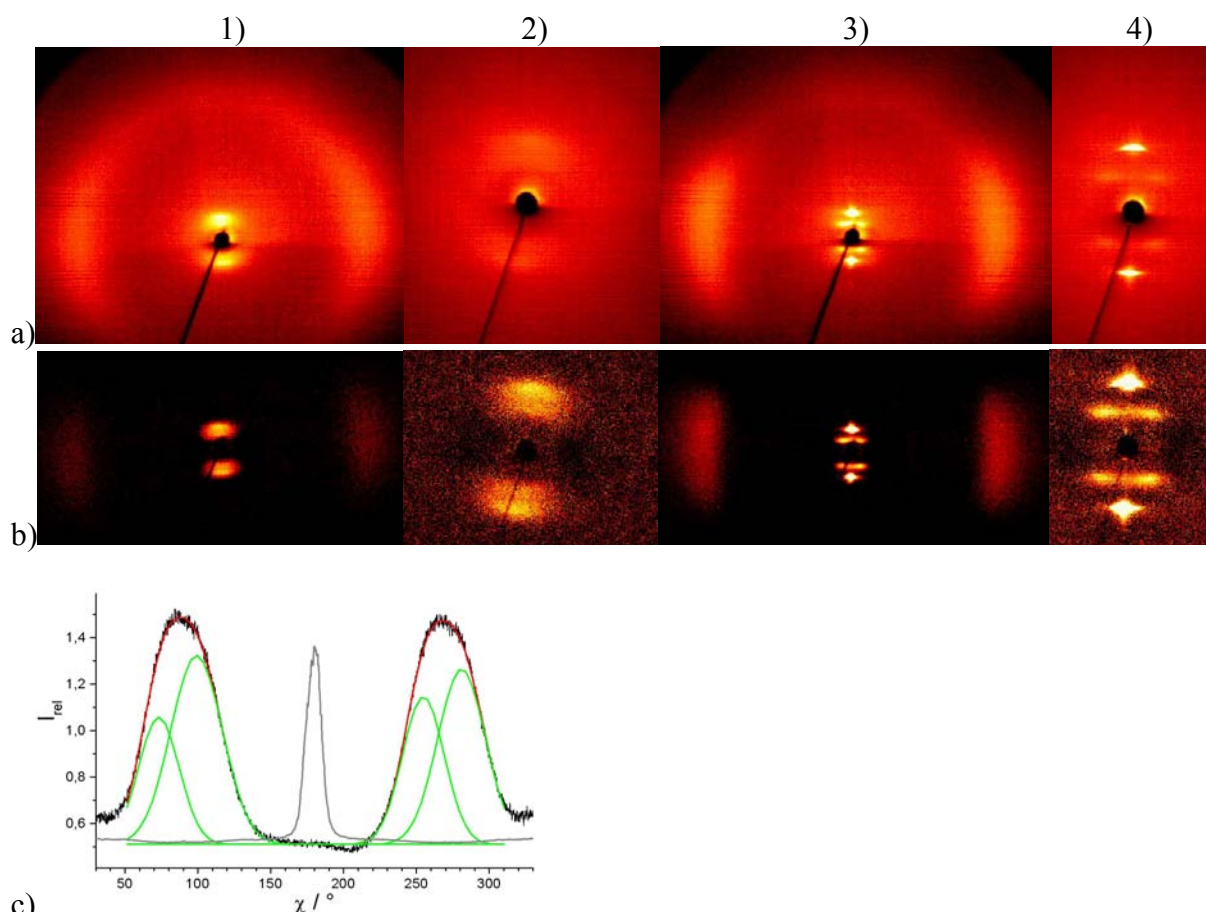

**Figure S6:** X-ray diffraction patterns of a surface-aligned sample for a mixture of 84 % **F** and 16 % **B** on cooling, row a) original XRD patterns, row b) intensity of the isotropic liquid at 125 °C subtracted from these patterns for clarity, columns 1, 2) nematic phase at 108 °C, columns 2, 3)  $B_X$  phase at 90 °C, columns 1, 3) WAXD, columns 2, 4) SAXD, c) determination of the maxima for the outer diffuse scattering at 90 °C by fitting 4 Gaussian curves (green lines) to the experimental  $\chi$ -scan (black line, relative intensity  $I_{rel}=I_{100^\circ C}/I_{125^\circ C}$ ) revealing a 13° tilt of the molecules with respect to the layer normal

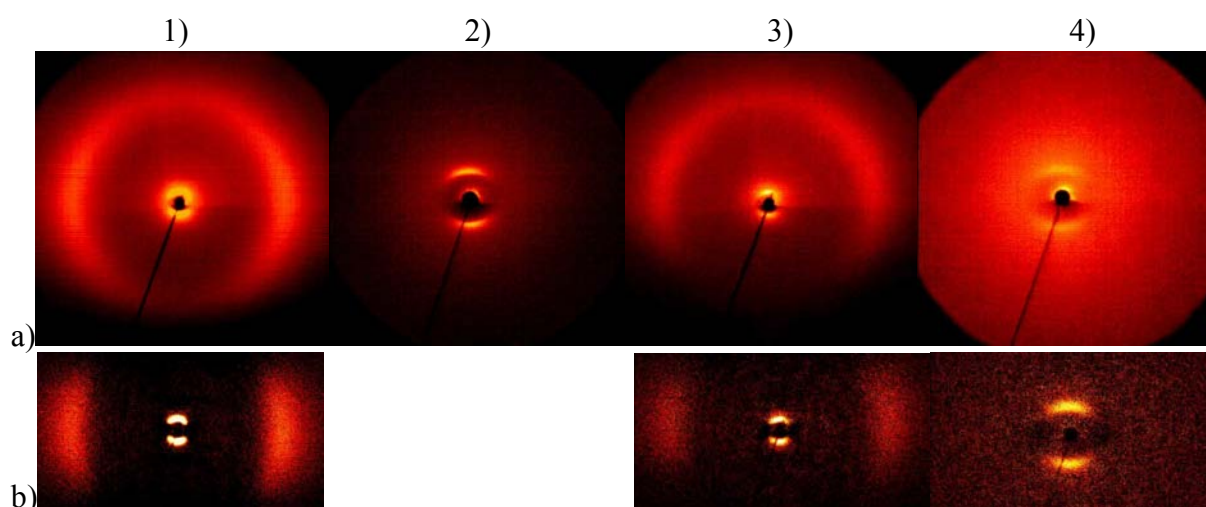

**Figure S7:** X-ray diffraction patterns for the nematic phases of surface-aligned samples for mixtures of 60 % **F** / 40 % **B** [columns 1) WAXD and 2) SAXD, 100 °C] and 70 % **F** / 30 % **B** [columns 3) WAXD and 4) SAXD, 102 °C] on cooling, row a) original XRD patterns, row b) intensity of the isotropic liquid at 110 °C subtracted from these patterns for clarity.

### Molecular Models

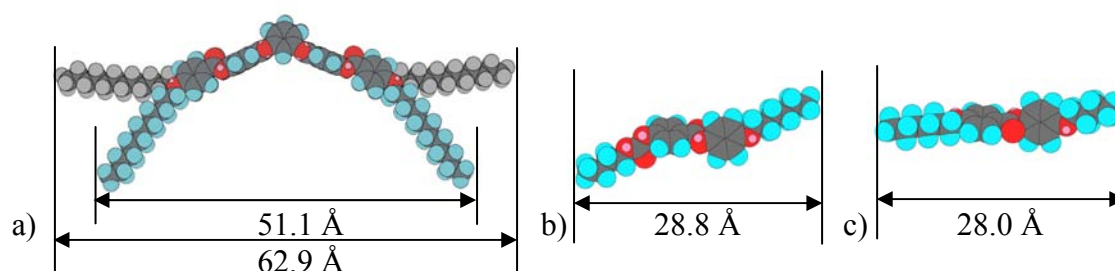

**Figure S8:** Molecular lengths estimated from modelling in Chem3D, measured for a) the bent-core molecule **A** with two extreme orientations of the all-trans chains with respect to the core (colour and gray scale, respectively; bending angle of the core =  $120^\circ$  [1],  $L = 54.5$  Å [2]), and for the most extended conformation of b) **C** and c) **D**.

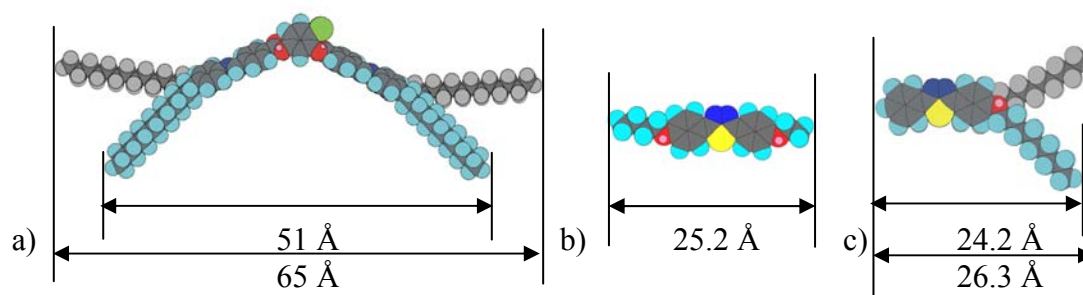

**Figure S9:** Molecular lengths estimated from modelling in Chem3D, measured for a) the bent-core molecule **B** with two extreme orientations of the all-trans chains with respect to the core (colour and gray scale, respectively; bending angle of the core =  $130^\circ$  [2]), b) the most extended conformation of **E**, and c) **F** with two extreme chain orientations.

**Additional Tables:**

**Table S1:** Data derived from the 2D X-ray patterns for systems **A/C**, **A/D**, **B/E**, and **B/F**; *T* ... temperature (°C), *2θ* ... diffraction angle (°), *d<sub>exp</sub>* ... experimental d value(Å), *n* ... order of the reflection, *h, k* ... Miller indices, *a, b, γ* ... lattice parameters (Å and °, respectively), *d<sub>calc</sub>* ... d value calculated from the layer distance or the lattice parameters, respectively (Å), phases: N ... nematic, SmCP ... polar smectic layer structure, SmCP' ... not clearly specified polar smectic layer structure, presumably undulated, USmCP .. undulated smectic layer structure, Col<sub>rec</sub> ... modulated layer structure with a rectangular 2D lattice, Col<sub>ob</sub> ... modulated layer structure with an oblique 2D lattice, B<sub>X</sub> ... modulated layer structure with a lower degree of order (short-range ordered modulation)

| Compound/<br>Mixture | Phase               | <i>T</i> | <i>2θ</i>          | <i>d<sub>exp</sub></i> | <i>n/<br/>hk</i> | <i>a</i> | <i>b</i> | <i>γ</i> | <i>d<sub>calc</sub></i> | <i>d<sub>exp</sub>-<br/>d<sub>calc</sub></i> |  |
|----------------------|---------------------|----------|--------------------|------------------------|------------------|----------|----------|----------|-------------------------|----------------------------------------------|--|
| <b>System A/C</b>    |                     |          |                    |                        |                  |          |          |          |                         |                                              |  |
| <b>A90/C10</b>       | SmCP                | 90       | 2.450              | 36.1                   | 1                |          |          |          | 36.2                    | -0.1                                         |  |
|                      |                     |          | 4.870              | 18.1                   | 2                |          |          |          | 18.1                    | 0.0                                          |  |
|                      |                     |          | 7.339              | 12.0                   | 3                |          |          |          | 12.0                    | 0.0                                          |  |
| <b>A60/C40</b>       | Col <sub>rec</sub>  | 92       | 2.829              | 31.2                   | 11               | 40.1     | 49.6     |          |                         |                                              |  |
|                      |                     |          | 3.562              | 24.8                   | 02               |          |          |          |                         |                                              |  |
|                      |                     |          | 80                 | 2.868                  | 30.8*            | 11       | 39.0     | 50.2     |                         |                                              |  |
| <b>A30/C70</b>       | Col <sub>rec</sub>  | 81       | 2.942              | 30.0                   | 11               | 37.3     | 50.4     |          |                         |                                              |  |
|                      |                     |          | 3.504              | 25.2                   | 02               |          |          |          |                         |                                              |  |
|                      |                     |          | Col <sub>rec</sub> | 75                     | 3.010            | 29.4*    | 11       | 36.2     | 50.4                    |                                              |  |
| 3.501                | 25.2                | 02       |                    |                        |                  |          |          |          |                         |                                              |  |
| <b>A26/C74</b>       | B <sub>X</sub>      | 65       | 2.998              | 29.5*                  | 11               | 36.2     | 50.8     |          |                         |                                              |  |
|                      |                     |          | 3.477              | 25.4                   | 02               |          |          |          |                         |                                              |  |
|                      |                     |          | 3.014              | 29.3*                  | 11               | 36.3     | 50.7     |          |                         |                                              |  |
| <b>A18/C82</b>       | N                   | 74       | 3.892              | 22.7*                  |                  |          |          |          |                         |                                              |  |
|                      |                     |          | B <sub>X</sub>     | 60                     | 3.261            | 27.1*    | 11       | 32.0     | 50.8                    |                                              |  |
|                      |                     |          |                    | 3.471                  | 25.4             | 02       |          |          |                         |                                              |  |
| <b>System A/D</b>    |                     |          |                    |                        |                  |          |          |          |                         |                                              |  |
| <b>A50/D50</b>       | Col <sub>rec</sub>  | 90       | 2.970              | 29.7                   | 11               | 37.5     | 49.0     |          |                         |                                              |  |
|                      |                     |          | 3.609              | 24.4                   | 02               |          |          |          |                         |                                              |  |
| <b>A40/D60</b>       | Col <sub>rec.</sub> | 90       | 2.909              | 30.3                   | 11               | 38.7     | 49.0     |          |                         |                                              |  |
|                      |                     |          | 3.604              | 24.5                   | 02               |          |          |          |                         |                                              |  |
| <b>A25/D75</b>       | B <sub>X</sub>      | 80       | 3.002              | 29.4                   | 11               | 36.7     | 49.1     |          |                         |                                              |  |
|                      |                     |          | 3.595              | 24.5                   | 02               |          |          |          |                         |                                              |  |
| <b>A20/D80</b>       | B <sub>X</sub>      | 70       | 3.588              | 24.6                   | 02               |          |          |          |                         |                                              |  |
| <b>System B/E</b>    |                     |          |                    |                        |                  |          |          |          |                         |                                              |  |
| <b>B50/E50</b>       | N                   | 122      | 1.953              | 45.2*                  |                  |          |          |          |                         |                                              |  |
|                      | SmCP                | 115      | 1.785              | 49.5                   | 1                |          |          |          | 50.0                    | -0.5                                         |  |
|                      |                     |          | 3.461              | 25.5                   | 2                |          |          |          | 25.0                    | 0.5                                          |  |
| <b>B70/E30</b>       | N                   | 125      | 2.104              | 42.0*                  |                  |          |          |          |                         |                                              |  |
|                      | SmCP'               |          | 1.806              | 48.9                   | 1                |          |          |          | 49.3                    | -0.4                                         |  |
|                      |                     |          | 3.558              | 24.8                   | 2                |          |          |          | 24.7                    | 0.1                                          |  |

**Table S1:** (cont.)

| Compound/<br>Mixture | Phase             | $T$ | $2\theta$ | $d_{exp}$ | $n/hk$ | $a$  | $b$  | $\gamma$ | $d_{calc}$        | $d_{exp}-d_{calc}$ |
|----------------------|-------------------|-----|-----------|-----------|--------|------|------|----------|-------------------|--------------------|
| <b>System B/F</b>    |                   |     |           |           |        |      |      |          |                   |                    |
| <b>F</b>             | SmA               | 100 | 3.382     | 26.1      |        |      |      |          | 25.5 <sup>#</sup> | 0.6                |
|                      |                   |     | 6.789     | 13.0      |        |      |      |          | 12.8 <sup>#</sup> | 0.2                |
| <b>B75.5/F24.5</b>   | SmCP              | 100 | 1.871     | 47.2      |        |      |      |          | 46.5 <sup>#</sup> | 0.7                |
| <b>B40/F60</b>       | N                 | 100 | 1.943     | 45.5*     |        |      |      |          |                   |                    |
|                      | USmCP             | 90  | 1.748     | 50.5      | 11     | 204  | 52.2 |          | 50.5              | 0.0                |
|                      |                   |     | 1.902     | 46.4      | 12     |      |      |          | 46.4              | 0.0                |
|                      |                   |     | 3.355     | 26.3      | 20     |      |      |          | 26.1              | 0.2                |
|                      |                   |     | 3.440     | 25.7      | 21     |      |      |          | 25.9              | -0.2               |
|                      |                   |     | 3.495     | 25.3      | 22     |      |      |          | 25.3              | 0.0                |
| <b>B30/F70</b>       | N                 | 102 | 2.137     | 41.4*     |        |      |      |          |                   |                    |
|                      | Col <sub>ob</sub> |     | 1.985     | 44.5      | 11     | 122  | 53.5 | 102.5    | 44.6              | -0.1               |
|                      |                   |     | 3.370     | 26.2      | 02     |      |      |          | 26.2              | 0.0                |
|                      |                   |     | 3.970     | 22.3      | 22     |      |      |          | 22.3              | 0.0                |
| <b>B16/F84</b>       | N                 | 108 | 2.345     | 37.7*     |        |      |      |          |                   |                    |
|                      |                   |     | 3.311     | 26.7*     |        |      |      |          |                   |                    |
|                      | B <sub>x</sub>    | 90  | 2.183     | 40.5*     | 11     | 63.5 | 52.6 |          |                   |                    |
|                      |                   |     | 3.356     | 26.3      | 02     |      |      |          |                   |                    |

\* maximum of the diffuse reflection, <sup>#</sup> layer spacing derived from Guinier patterns

**Table S2:** A rough estimate of the numbers of molecules in the cross section of the 2D unit cell for selected mixtures of systems **A/C** and **A/D**

| Mixture                  | $V_{\text{Mol,C,D}}$ | $V_{\text{Mol,A}}$ | $x_{\text{C,D}}$ | $x_{\text{A}}$ | $V_{\text{cell}}$   | $n_{\text{cell}}$ | $n_{\text{C,D,cell}}$ | $n_{\text{A,cell}}$ |
|--------------------------|----------------------|--------------------|------------------|----------------|---------------------|-------------------|-----------------------|---------------------|
| <b>A60/C40</b> , crystal | 559.6                | 1289.0             | 0.4              | 0.6            | 10342.6<br>at 92 °C | 10.4              | 4.1                   | 6.2                 |
| liquid                   | 712.2                | 1640.5             |                  |                |                     | 8.1               | 3.3                   | 4.9                 |
| Average in l.c.          |                      |                    |                  |                |                     | 9.3               | 3.7                   | 5.6                 |
| <b>A30/C70</b> , crystal | 559.6                | 1289.0             | 0.7              | 0.3            | 9562.6<br>at 65 °C  | 12.3              | 8.6                   | 3.7                 |
| liquid                   | 712.2                | 1640.5             |                  |                |                     | 9.7               | 6.8                   | 2.9                 |
| Average in l.c.          |                      |                    |                  |                |                     | 11.0              | 7.7                   | 3.3                 |
| <b>A40/D60</b> , crystal | 522.7                | 1289.0             | 0.6              | 0.4            | 9860.8<br>at 90 °C  | 11.9              | 7.1                   | 4.8                 |
| liquid                   | 655.3                | 1640.5             |                  |                |                     | 9.4               | 5.6                   | 3.8                 |
| Average in l.c.          |                      |                    |                  |                |                     | 10.7              | 6.4                   | 4.3                 |
| <b>A25/D75</b> , crystal | 522.7                | 1289.0             | 0.75             | 0.25           | 9370.2<br>at 80 °C  | 13.1              | 9.8                   | 3.3                 |
| liquid                   | 655.3                | 1640.5             |                  |                |                     | 10.4              | 7.8                   | 2.6                 |
| Average in l.c.          |                      |                    |                  |                |                     | 11.8              | 8.9                   | 2.9                 |

$V_{\text{mol,crystal}}$  ... molecular volume in the crystal calculated using crystal volume increments: Immirzi and Perini [3], average packing coefficient in the crystal  $k = 0.7$  according to Kitaigorodski [4],  $V_{\text{mol,liquid}}$  ... molecular volume in the isotropic liquid, average packing coefficient  $k = 0.55$ ,  $V_{\text{cell}}$  ... unit cell volume obtained from the lattice parameters and assuming a height of  $h = 0.52$  nm (assuming a stacking in bend direction of the bent-core molecules with a bend angle of  $120^\circ$ ),  $x_{\text{A}}$ ,  $x_{\text{C,D}}$  ... molar fraction of compound **A** and **C,D**, respectively,  $n_{\text{cell}}$  ... number of molecules in a unit cell with crystal-like density (crystal) according to  $n_{\text{cell}} = V_{\text{cell}} / (x_{\text{A}} \cdot V_{\text{molA}} + x_{\text{C,D}} \cdot V_{\text{molC,D}})$ , with liquid-like density according to  $n_{\text{cell}} = n_{\text{cell,crystal}} \cdot 0.55 / 0.7$ , and in the liquid crystalline phase (Average in l.c.) estimated as the intermediate between that in the crystalline and the liquid phase, numbers of molecules of compound **A** and **C,D**, respectively, in a cell:  $n_{\text{A,cell}} = n_{\text{cell}} \cdot x_{\text{A}}$  and  $n_{\text{C,D,cell}} = n_{\text{cell}} \cdot x_{\text{C,D}}$ .

## References:

- [1] G. Pelzl, S. Diele, W. Weissflog, *Adv. Mater.* 1999, **11**, 707-724
- [2] M. W. Schröder, S. Diele, G. Pelzl and W. Weissflog, *ChemPhysChem*, 2004, **4**, 99.
- [3] A. Immirzi, B. Perini, *Acta Cryst. Sect. A* 1977, **33**, 216-218
- [4] A. I. Kitaigorodski, "Molekülkristalle", Akademie-Verlag Berlin, 1979
